# Supplementary material for: Neuron-like hierarchical manganese sulfide@Cu2S core/shell arrays on Ni foam as an advanced electrode for an asymmetric supercapacitor
Source: Royal Society of Chemistry journal article supplement (doi:10.1039/d0ce00999g), 2020-01-01
Supplement: d0ce00999g1.pdf [file d0ce00999g1.pdf]

## Supporting Information

### Neuron-like Hierarchical Manganese sulfide@Cu<sub>2</sub>S Core/shell Arrays on Ni Foam as An Advanced Electrode for Asymmetric Supercapacitor

Hang He, Xijia Yang\*, Liying Wang\*, Xueyu Zhang, Xuesong Li, Wei Lü  
*Key Laboratory of Advanced Structural Materials, Ministry of Education & Advanced Institute of Materials Science, Changchun University of Technology, Changchun 130012, China*  
Address correspondence to E-mail: yangxijia@ccut.edu.cn, wangliying@ccut.edu.cn

Fax: +86-0431-85716577; Tel: +86-0431-85716577

\* To whom all correspondence should be addressed.

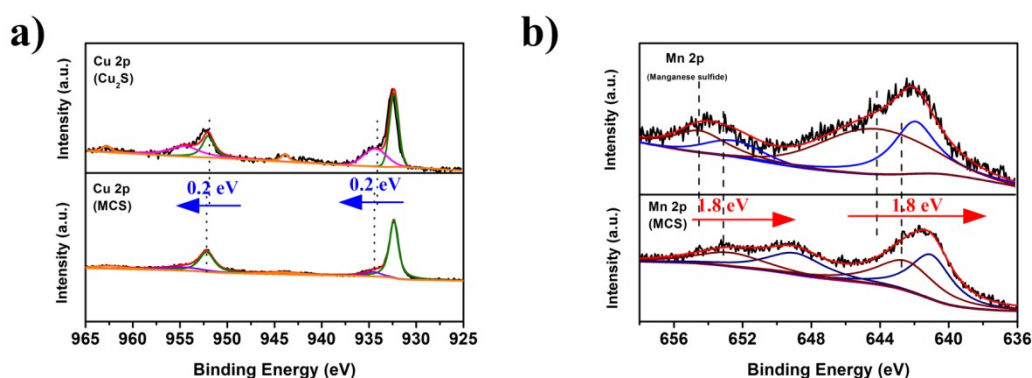

**Figure S1.** XPS spectra with peak fitting analysis for a) Cu 2p of Cu<sub>2</sub>S and MCS. b) Mn 2p of manganese sulfide and MCS, respectively.

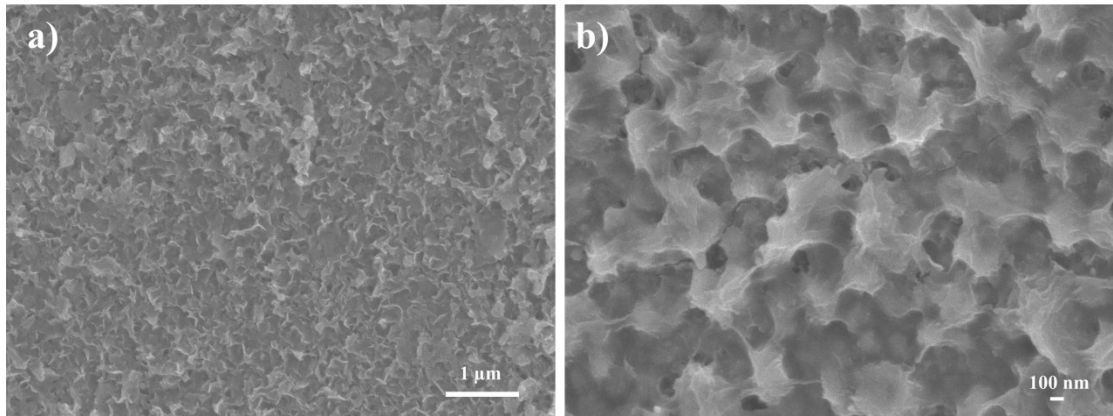

**Figure S2.** a) SEM image of the as prepared Ni Foam containing precursor. b) HRSEM image of the as prepared MCS on Ni foam.

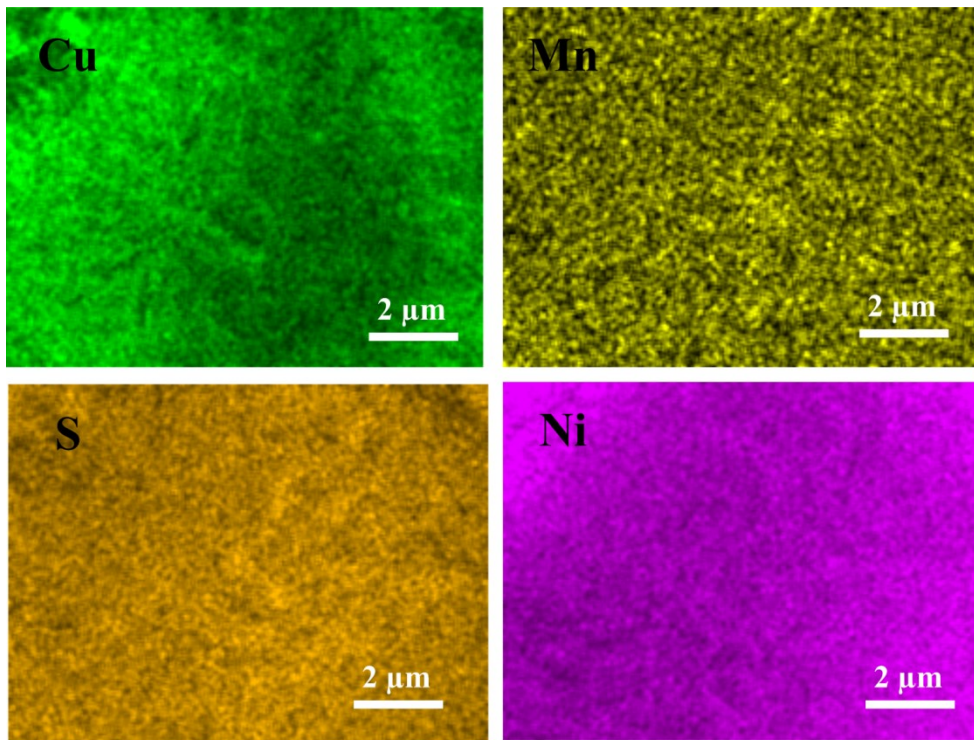

**Figure S3.** EDS-mapping of different elements. a) Cu b) Mn c) S d) Ni.

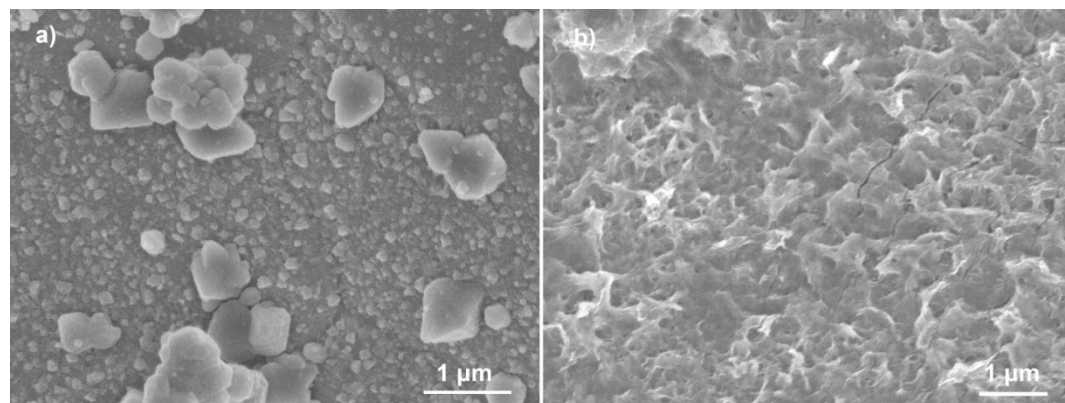

**Figure S4.** FE-SEM images of a) MS, b) CS.

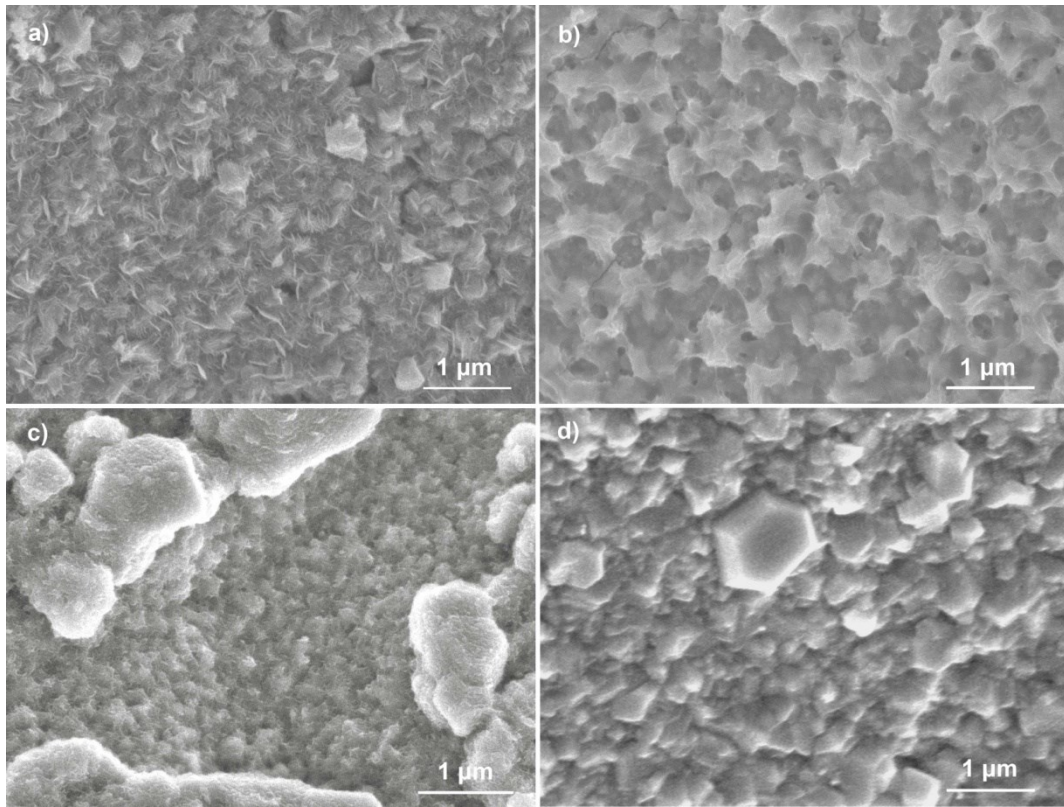

**Figure S5.** FE-SEM images of MCS on Ni foam with different temperature of sulfidation process: a) 85, b) 95, c) 110 and d) 140 °C.

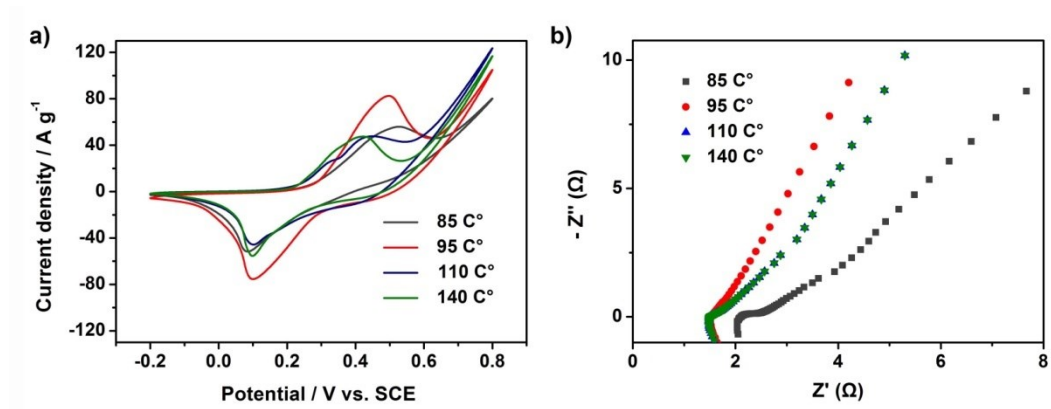

**Figure S6.** a) CV curves of the MCS with different temperature of sulfidation process, and b) corresponding EIS spectras.

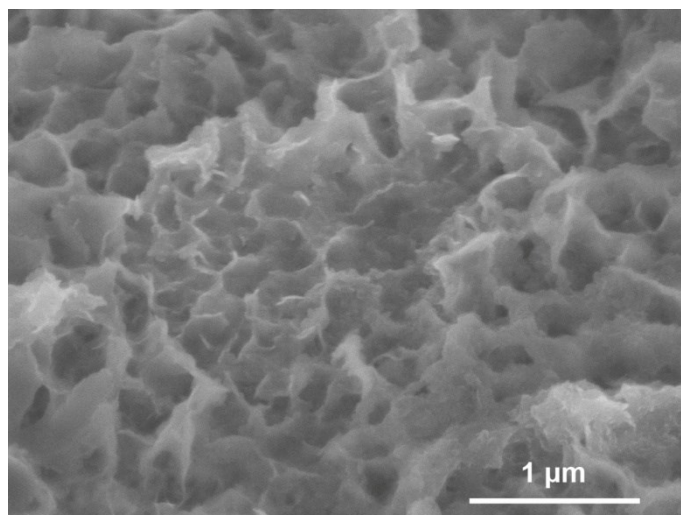

**Figure S7.** FE-SEM images of morphology of the MCS after 2000 charge–discharge cycles.

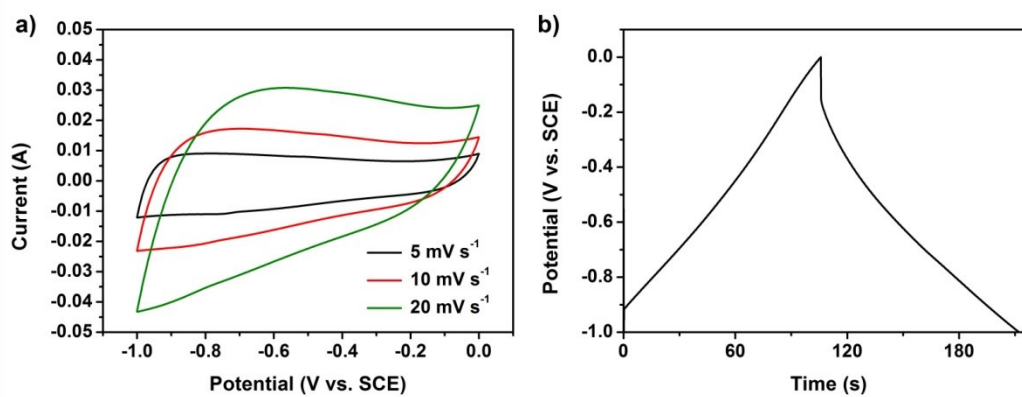

**Figure S8.** a) CV curves at the scan rates 5, 10 and 20 mV s<sup>-1</sup>, and b) Galvanostatic charge-discharge curves at a current density of 2 A g<sup>-1</sup> for AC.

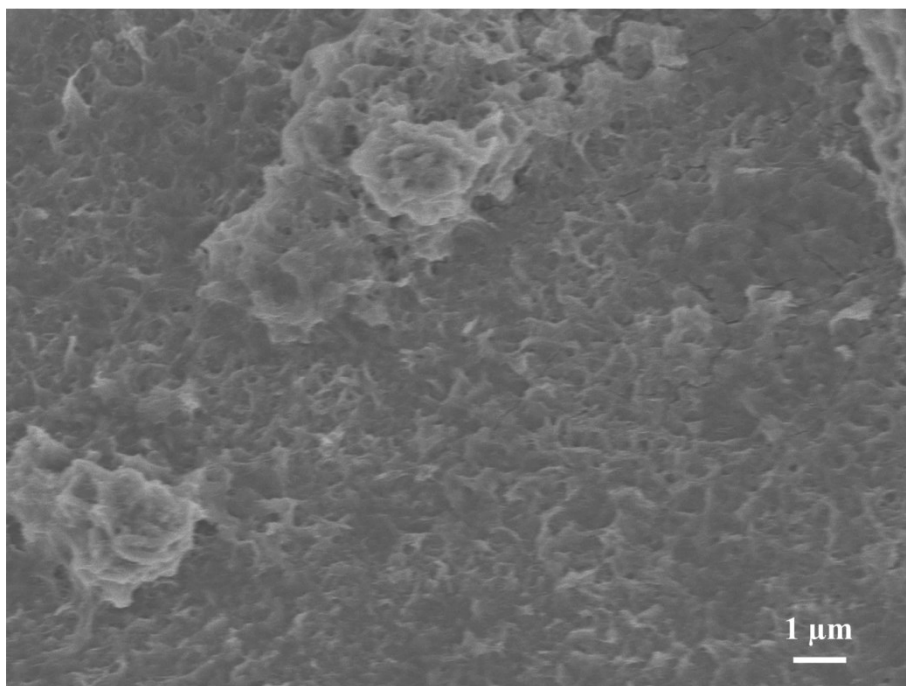

**Figure S9.** FE-SEM images of morphology of the MCS after 15000 charge–discharge cycles.
